# Supplementary material
Source: Research Square preprint supplement (doi:10.21203/rs.3.rs-8914106/v1)
Supplement: Supplementary file 1 [file 3cd964a2236ec867a7d5e32a.docx]

| 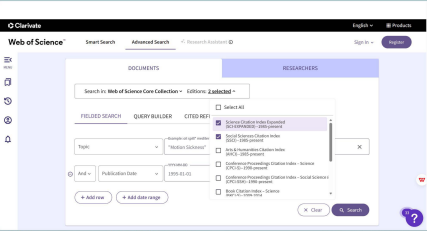 | 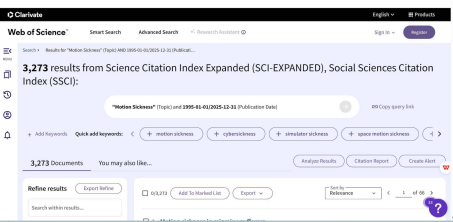 | 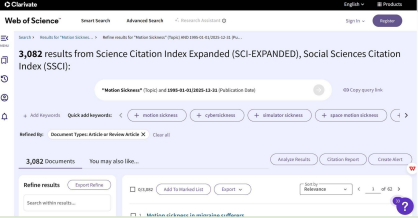 |
| --- | --- | --- |
| 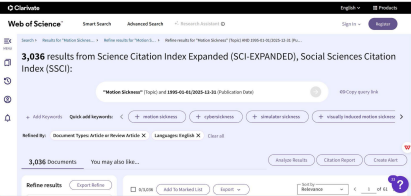 | 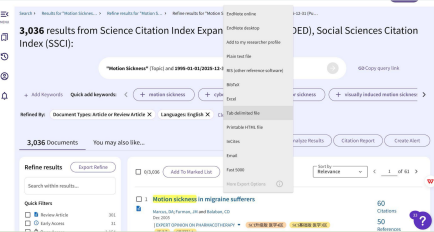 | 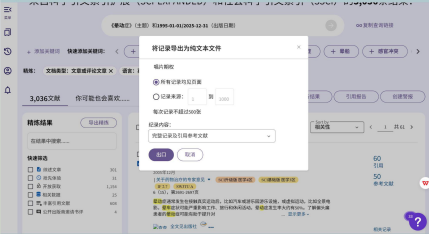 |

Figure S1. Detailed search strategy, data preprocessing methods, and screening results


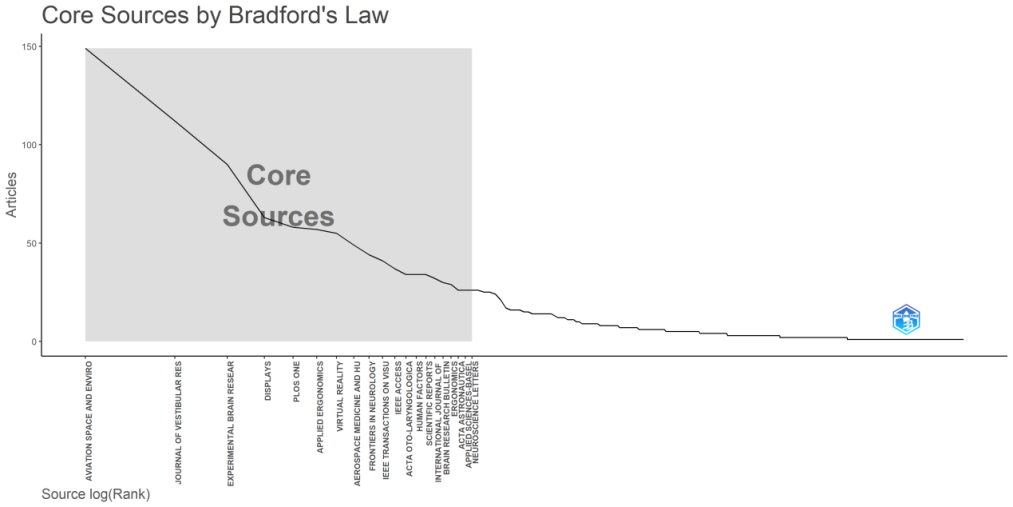


Figure S2. Core Sources by Bradford's Law.


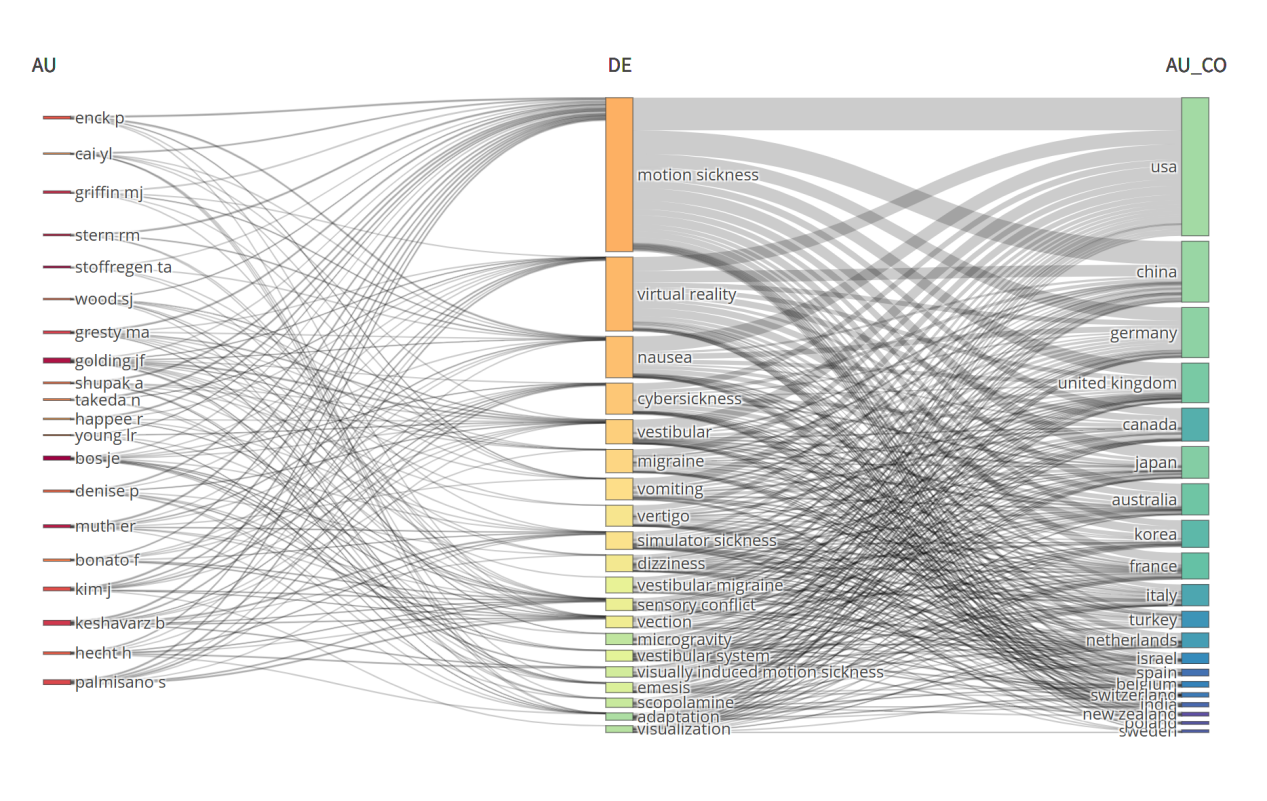


Figure S3. Three-field plot of authors, keywords, and countries
